# Supplementary material for: Intercomparison of surface meltwater routing models for the Greenland ice sheet and influence on subglacial effective pressures
Source: Copernicus journal article supplement (doi:10.5194/tc-14-3349-2020), 2020-10-07
Supplement: Supplementary file 1 [file tc-14-3349-2020-supplement.zip]

Archive with 12 entries (12 files):
- tc-14-3349-2020-supplement-title-page.pdf
- Figure S9.tif
- Figure S1.tif
- Figure S10.tif
- Figure S3.tif
- Figure S5.tif
- Figure S2.tif
- kyang_TCD_2020_supp.pdf
- Figure S4.tif
- Figure S6.tif
- Figure S7.gif
- Figure S8.tif
