# Supplementary material for: Intercomparison of surface meltwater routing models for the Greenland ice sheet and influence on subglacial effective pressures
Source: Copernicus journal article supplement (doi:10.5194/tc-14-3349-2020), 2020-10-07
Supplement: Supplementary file 1 [file tc-14-3349-2020-supplement.zip › tc-14-3349-2020-supplement-title-page.pdf]

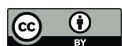

## *Supplement of*

# **Intercomparison of surface meltwater routing models for the Greenland ice sheet and influence on subglacial effective pressures**

**Kang Yang et al.**

*Correspondence to:* Kang Yang ([kangyang@nju.edu.cn](mailto:kangyang@nju.edu.cn))

- [tc-14-3349-2020-supplement-title-page.pdf](#)
- [Figure S1.tif](#)
- [Figure S10.tif](#)
- [Figure S2.tif](#)
- [Figure S3.tif](#)
- [Figure S4.tif](#)
- [Figure S5.tif](#)
- [Figure S6.tif](#)
- [Figure S7.gif](#)
- [Figure S8.tif](#)
- [Figure S9.tif](#)
- [kyang\\_TCD\\_2020\\_supp.pdf](#)

The copyright of individual parts of the supplement might differ from the CC BY 4.0 License.
