# Supplementary figures and images for: Intercomparison of surface meltwater routing models for the Greenland ice sheet and influence on subglacial effective pressures
Source: Copernicus journal article supplement (doi:10.5194/tc-14-3349-2020), 2020-10-07

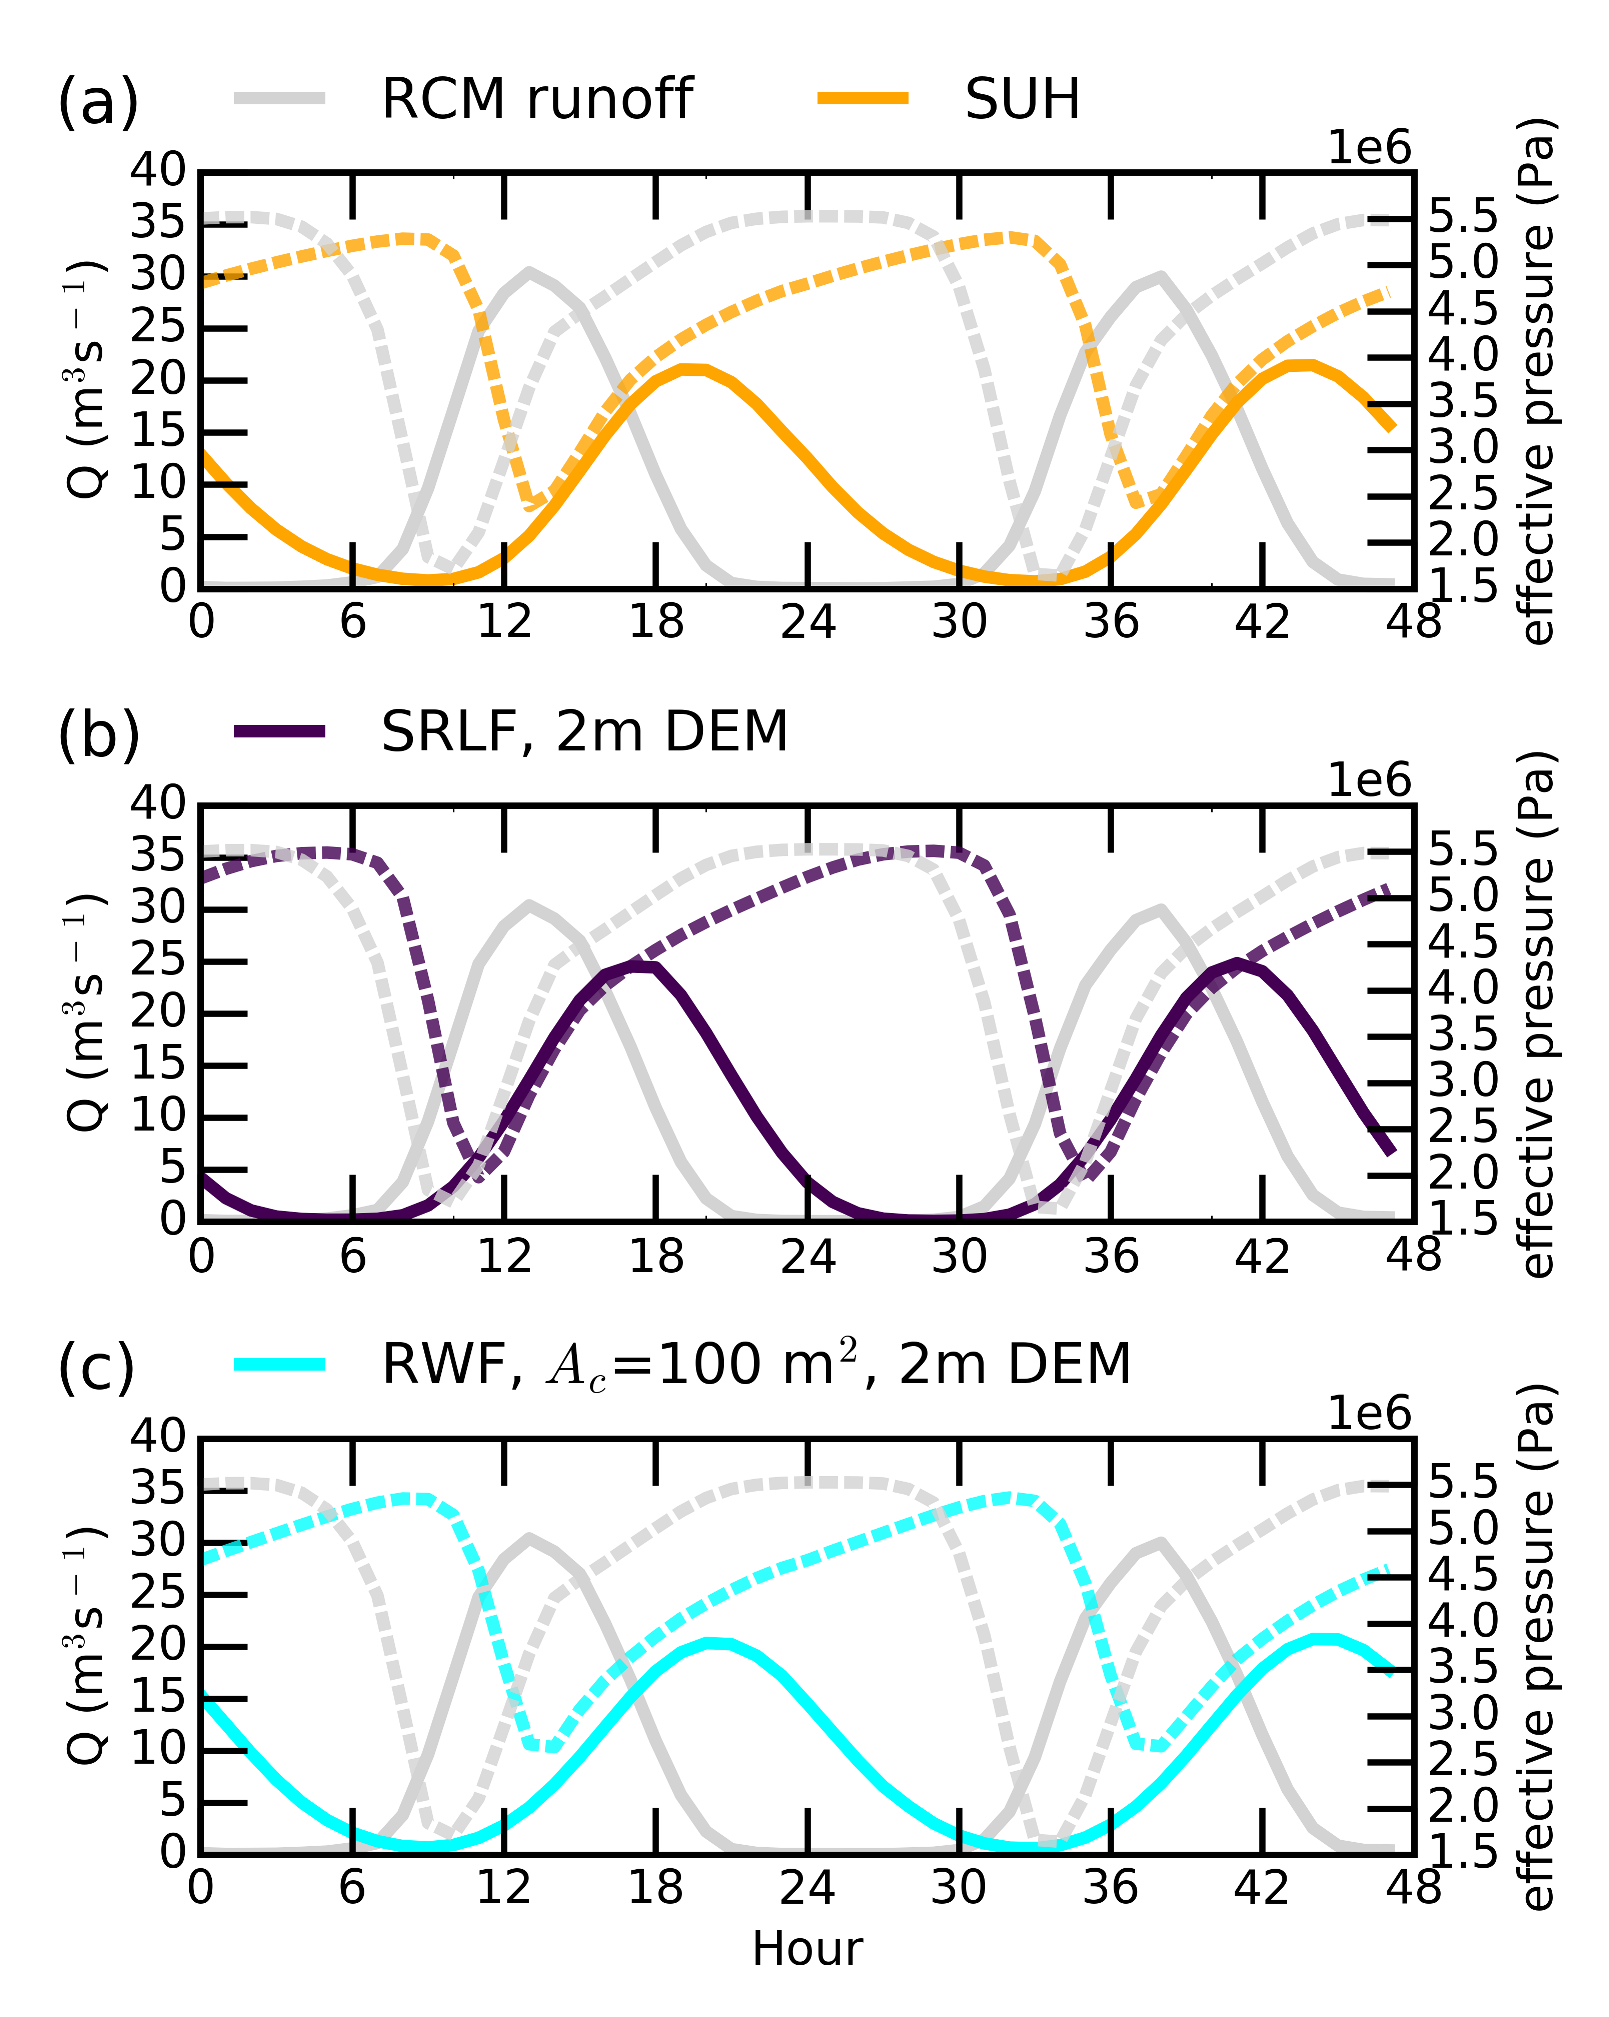

Supplement: Supplementary file 1 [file tc-14-3349-2020-supplement.zip › Figure S9.tif]

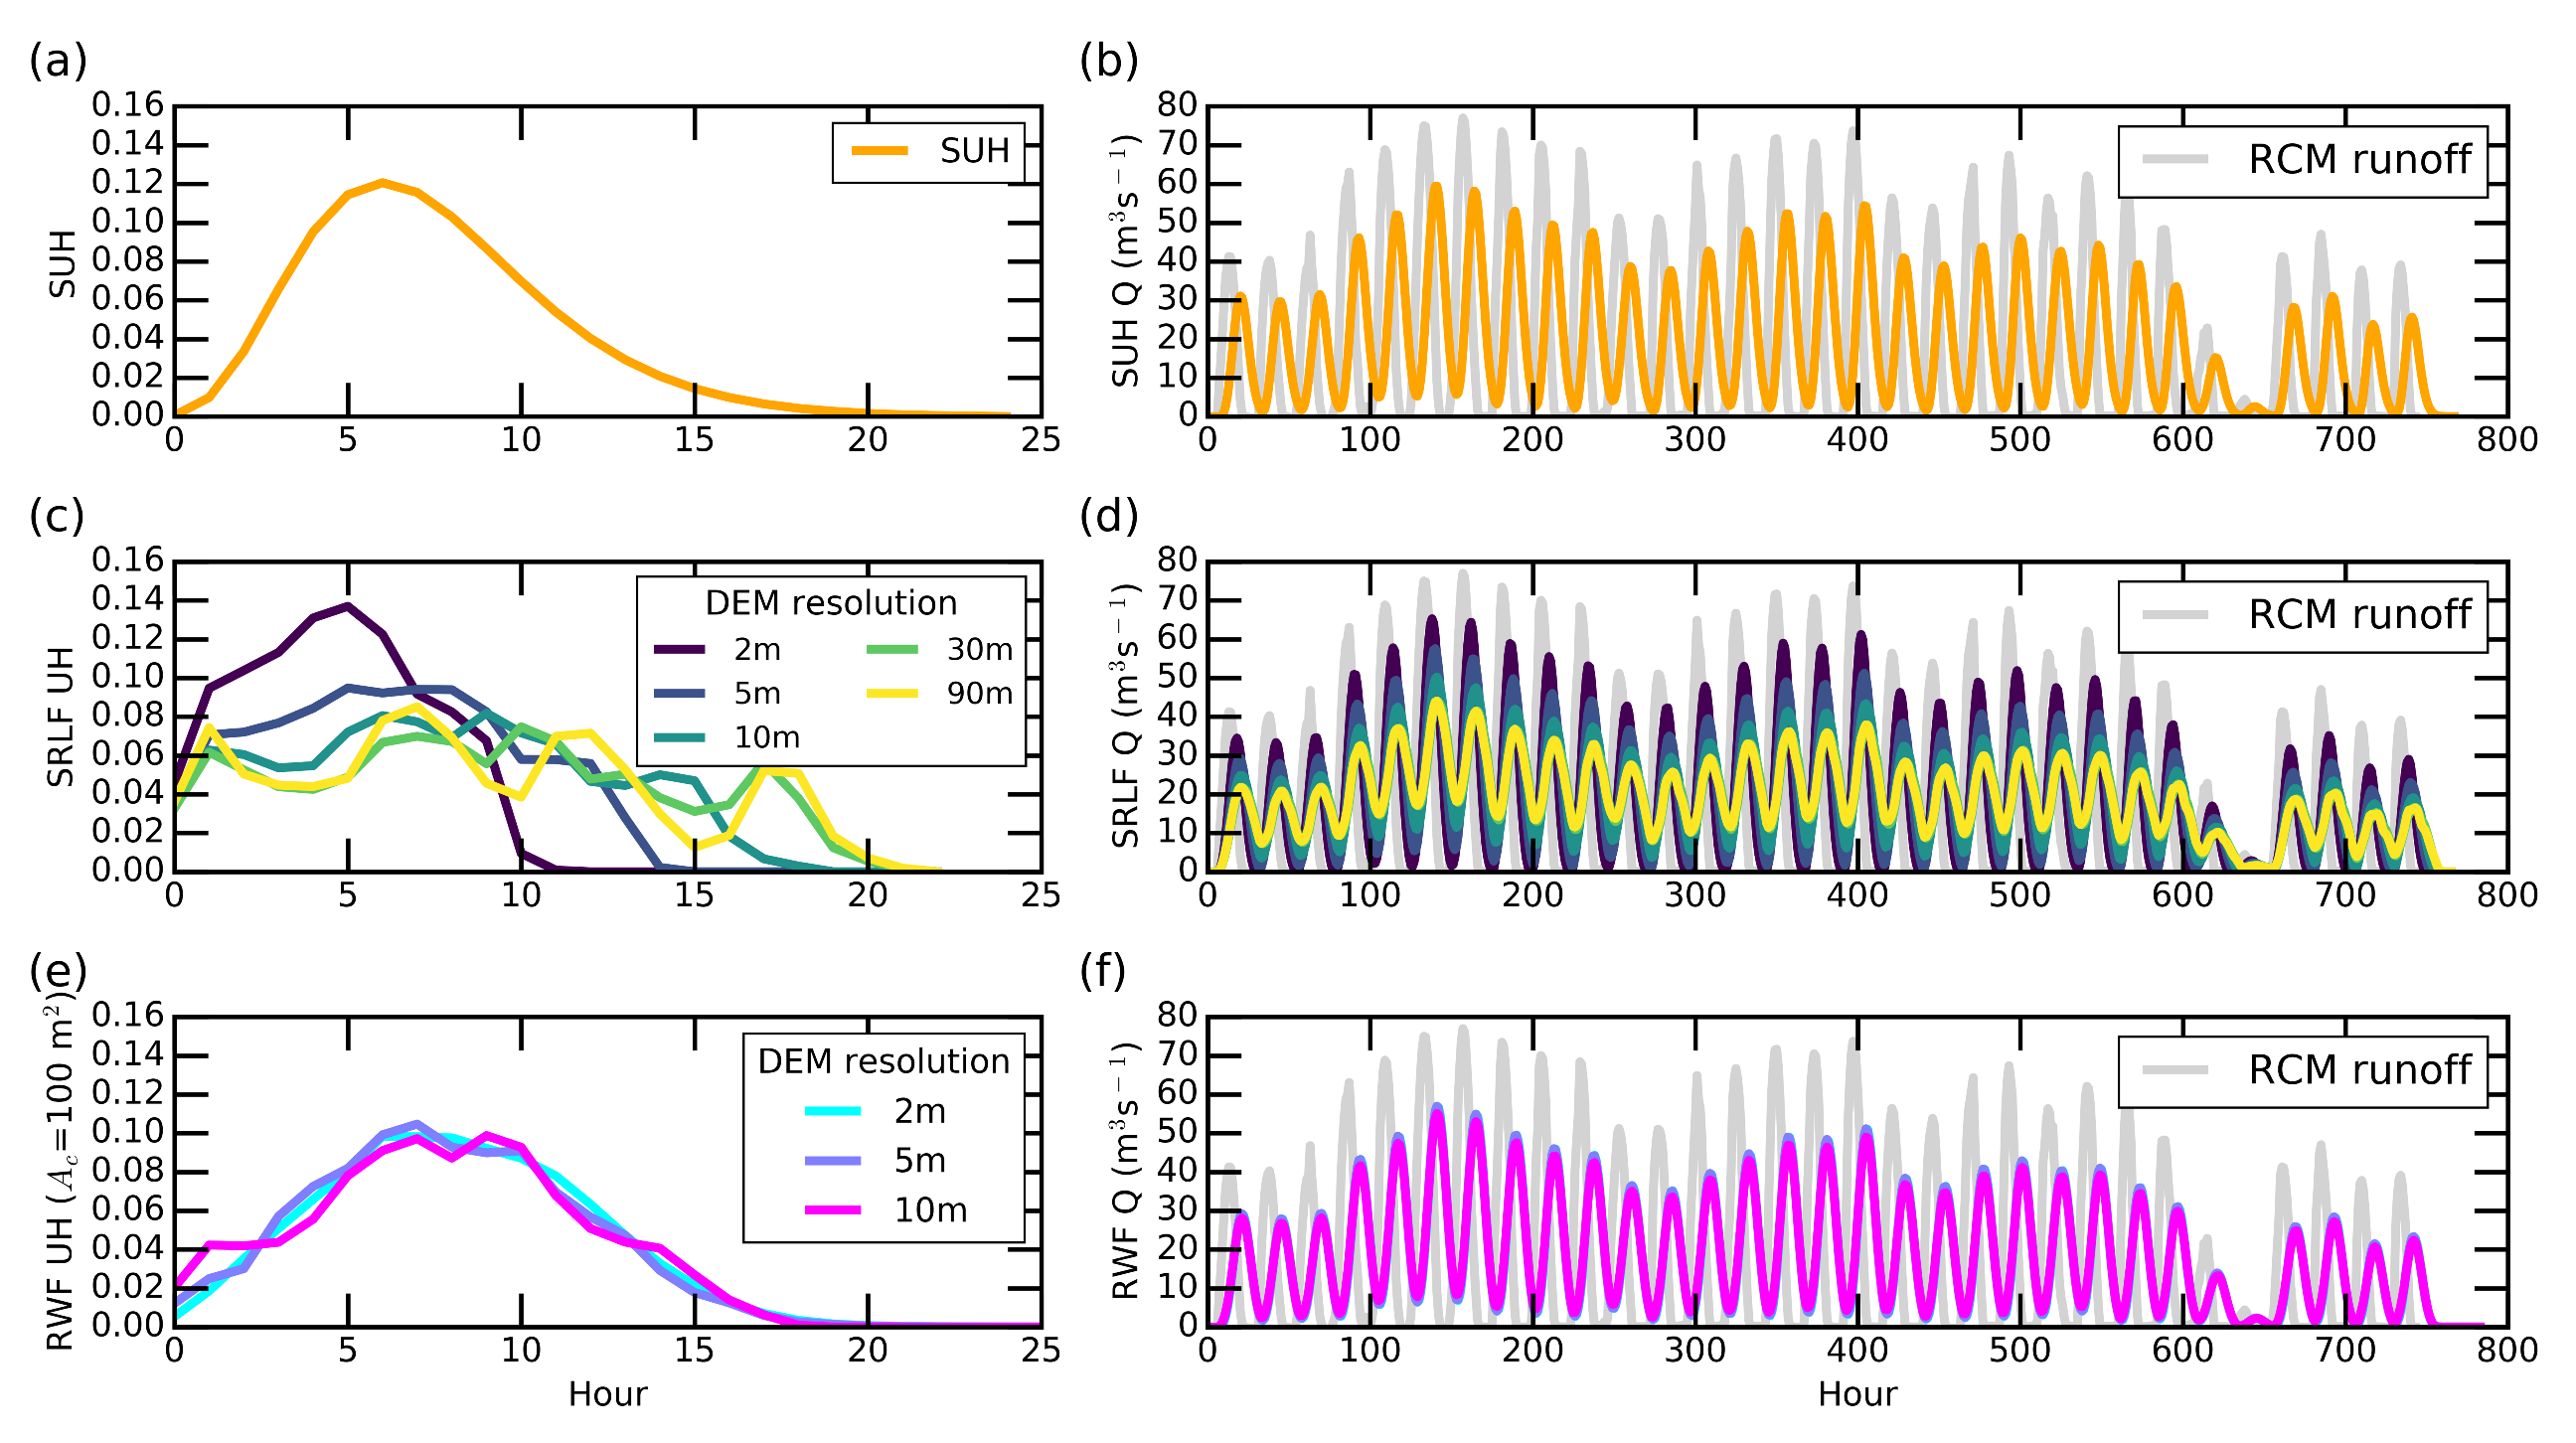

Supplement: Supplementary file 1 [file tc-14-3349-2020-supplement.zip › Figure S1.tif]

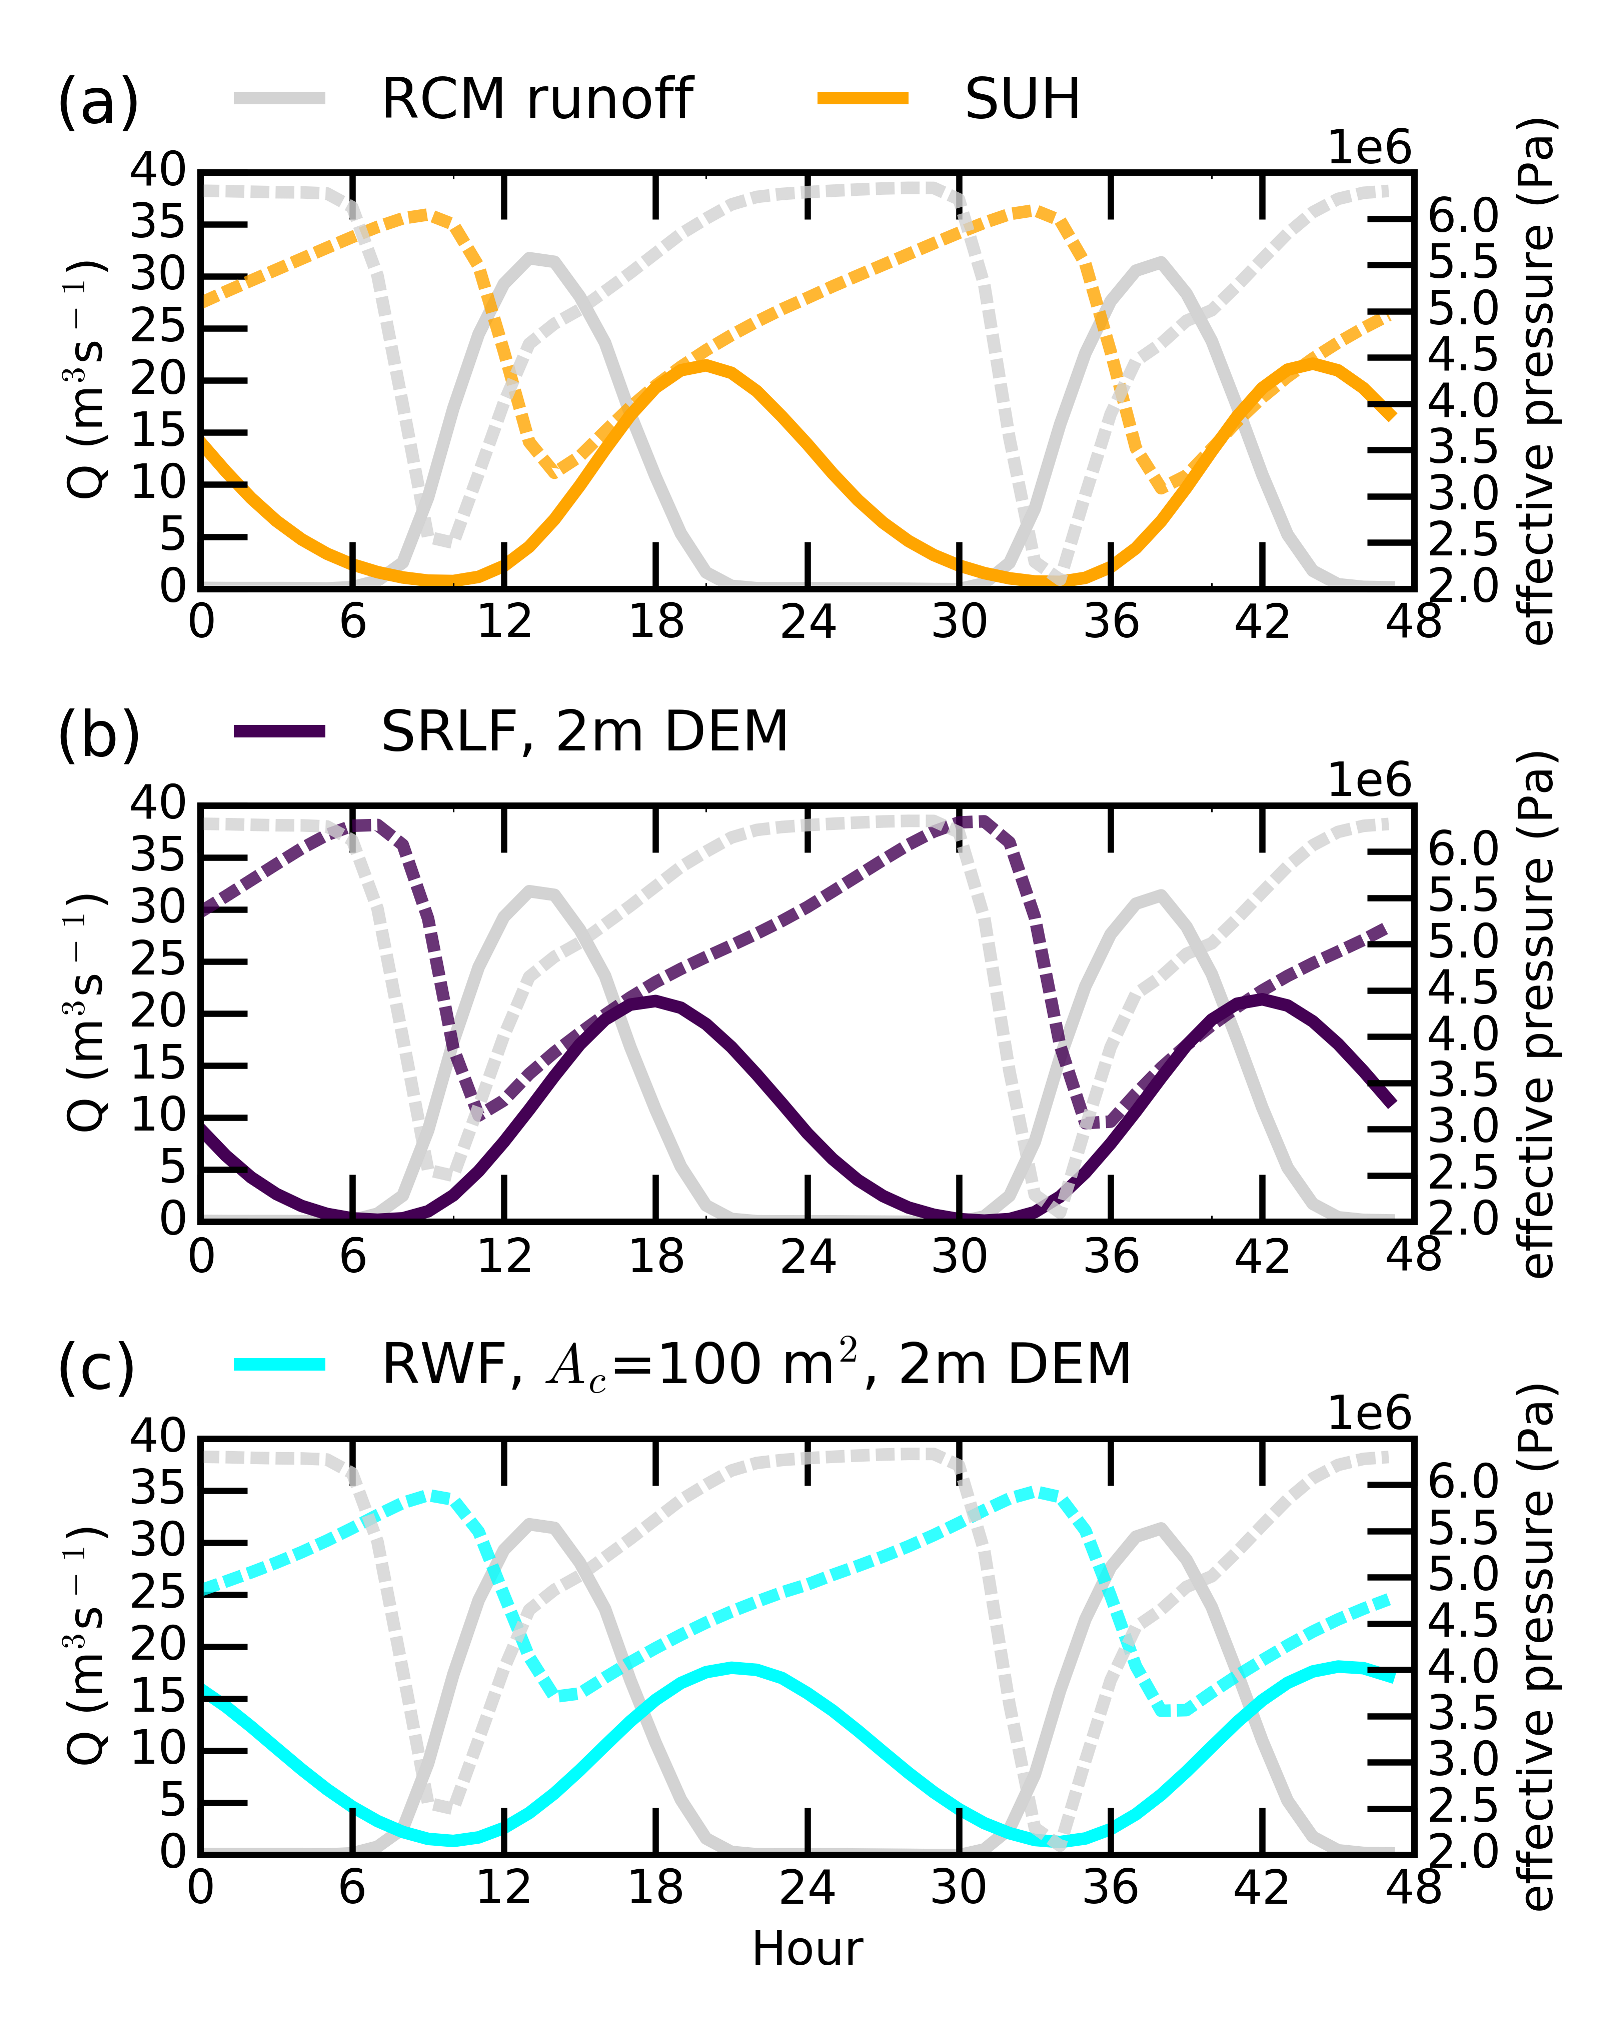

Supplement: Supplementary file 1 [file tc-14-3349-2020-supplement.zip › Figure S10.tif]

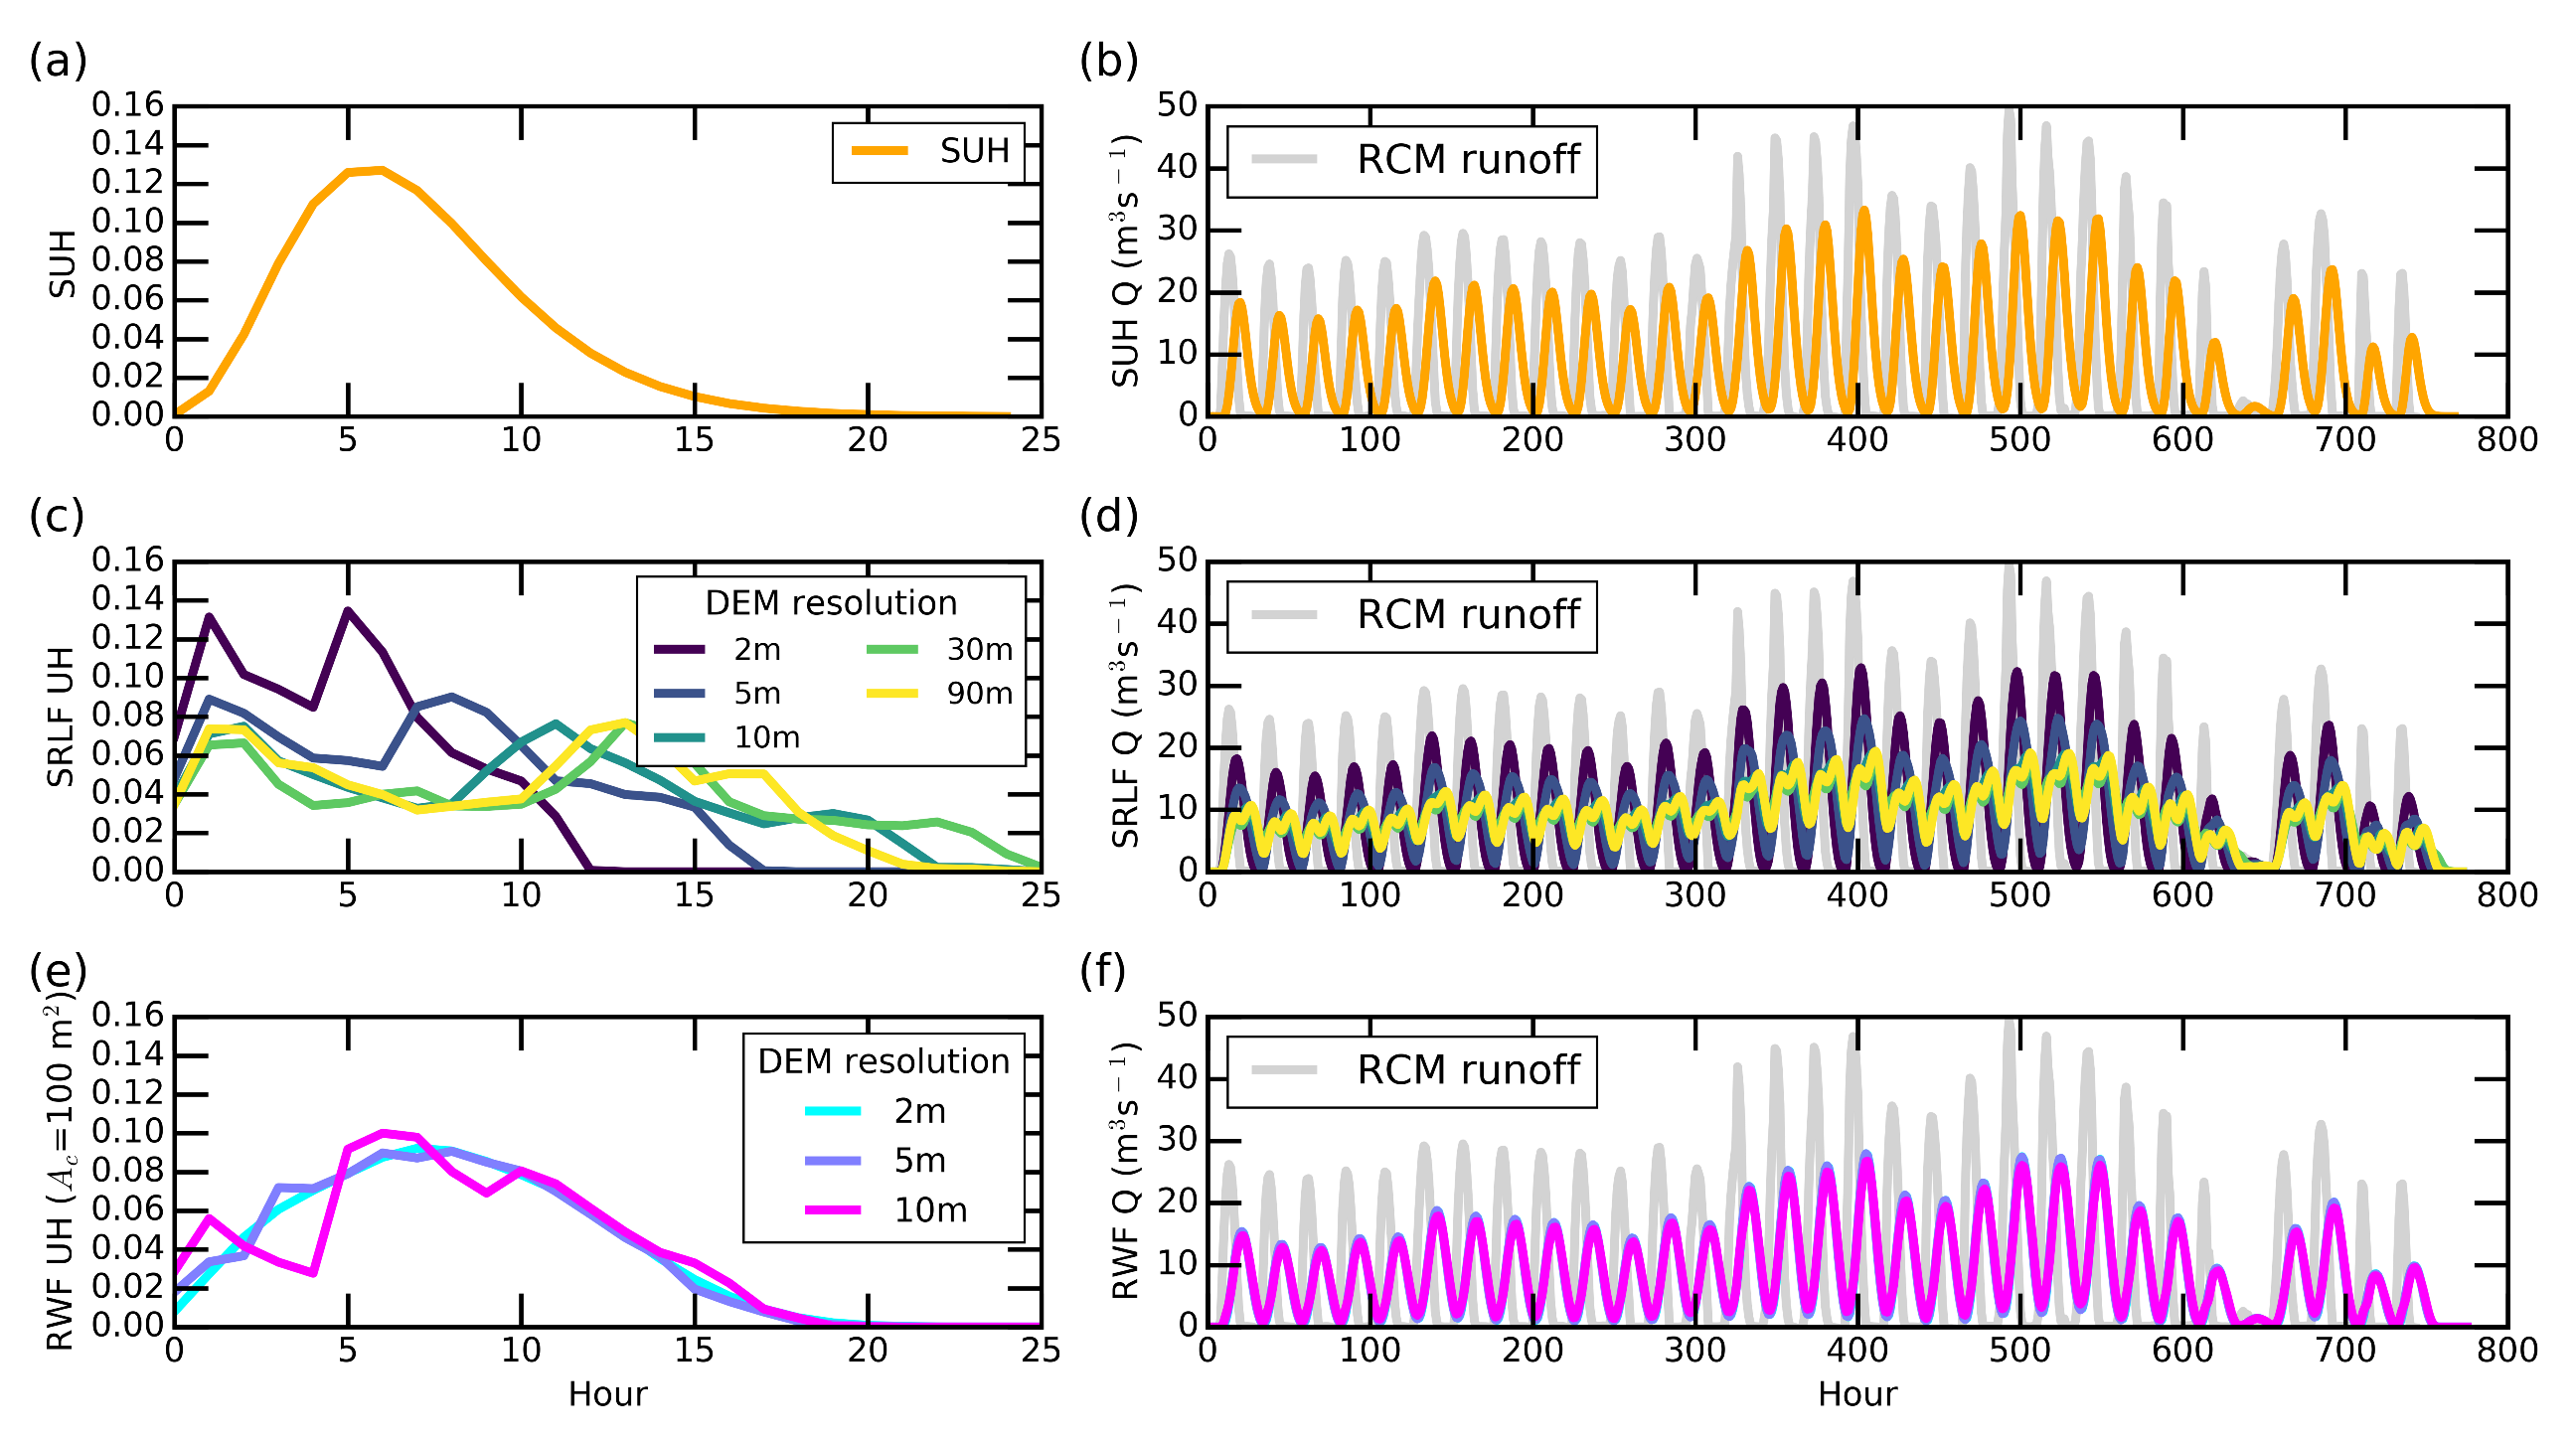

Supplement: Supplementary file 1 [file tc-14-3349-2020-supplement.zip › Figure S3.tif]

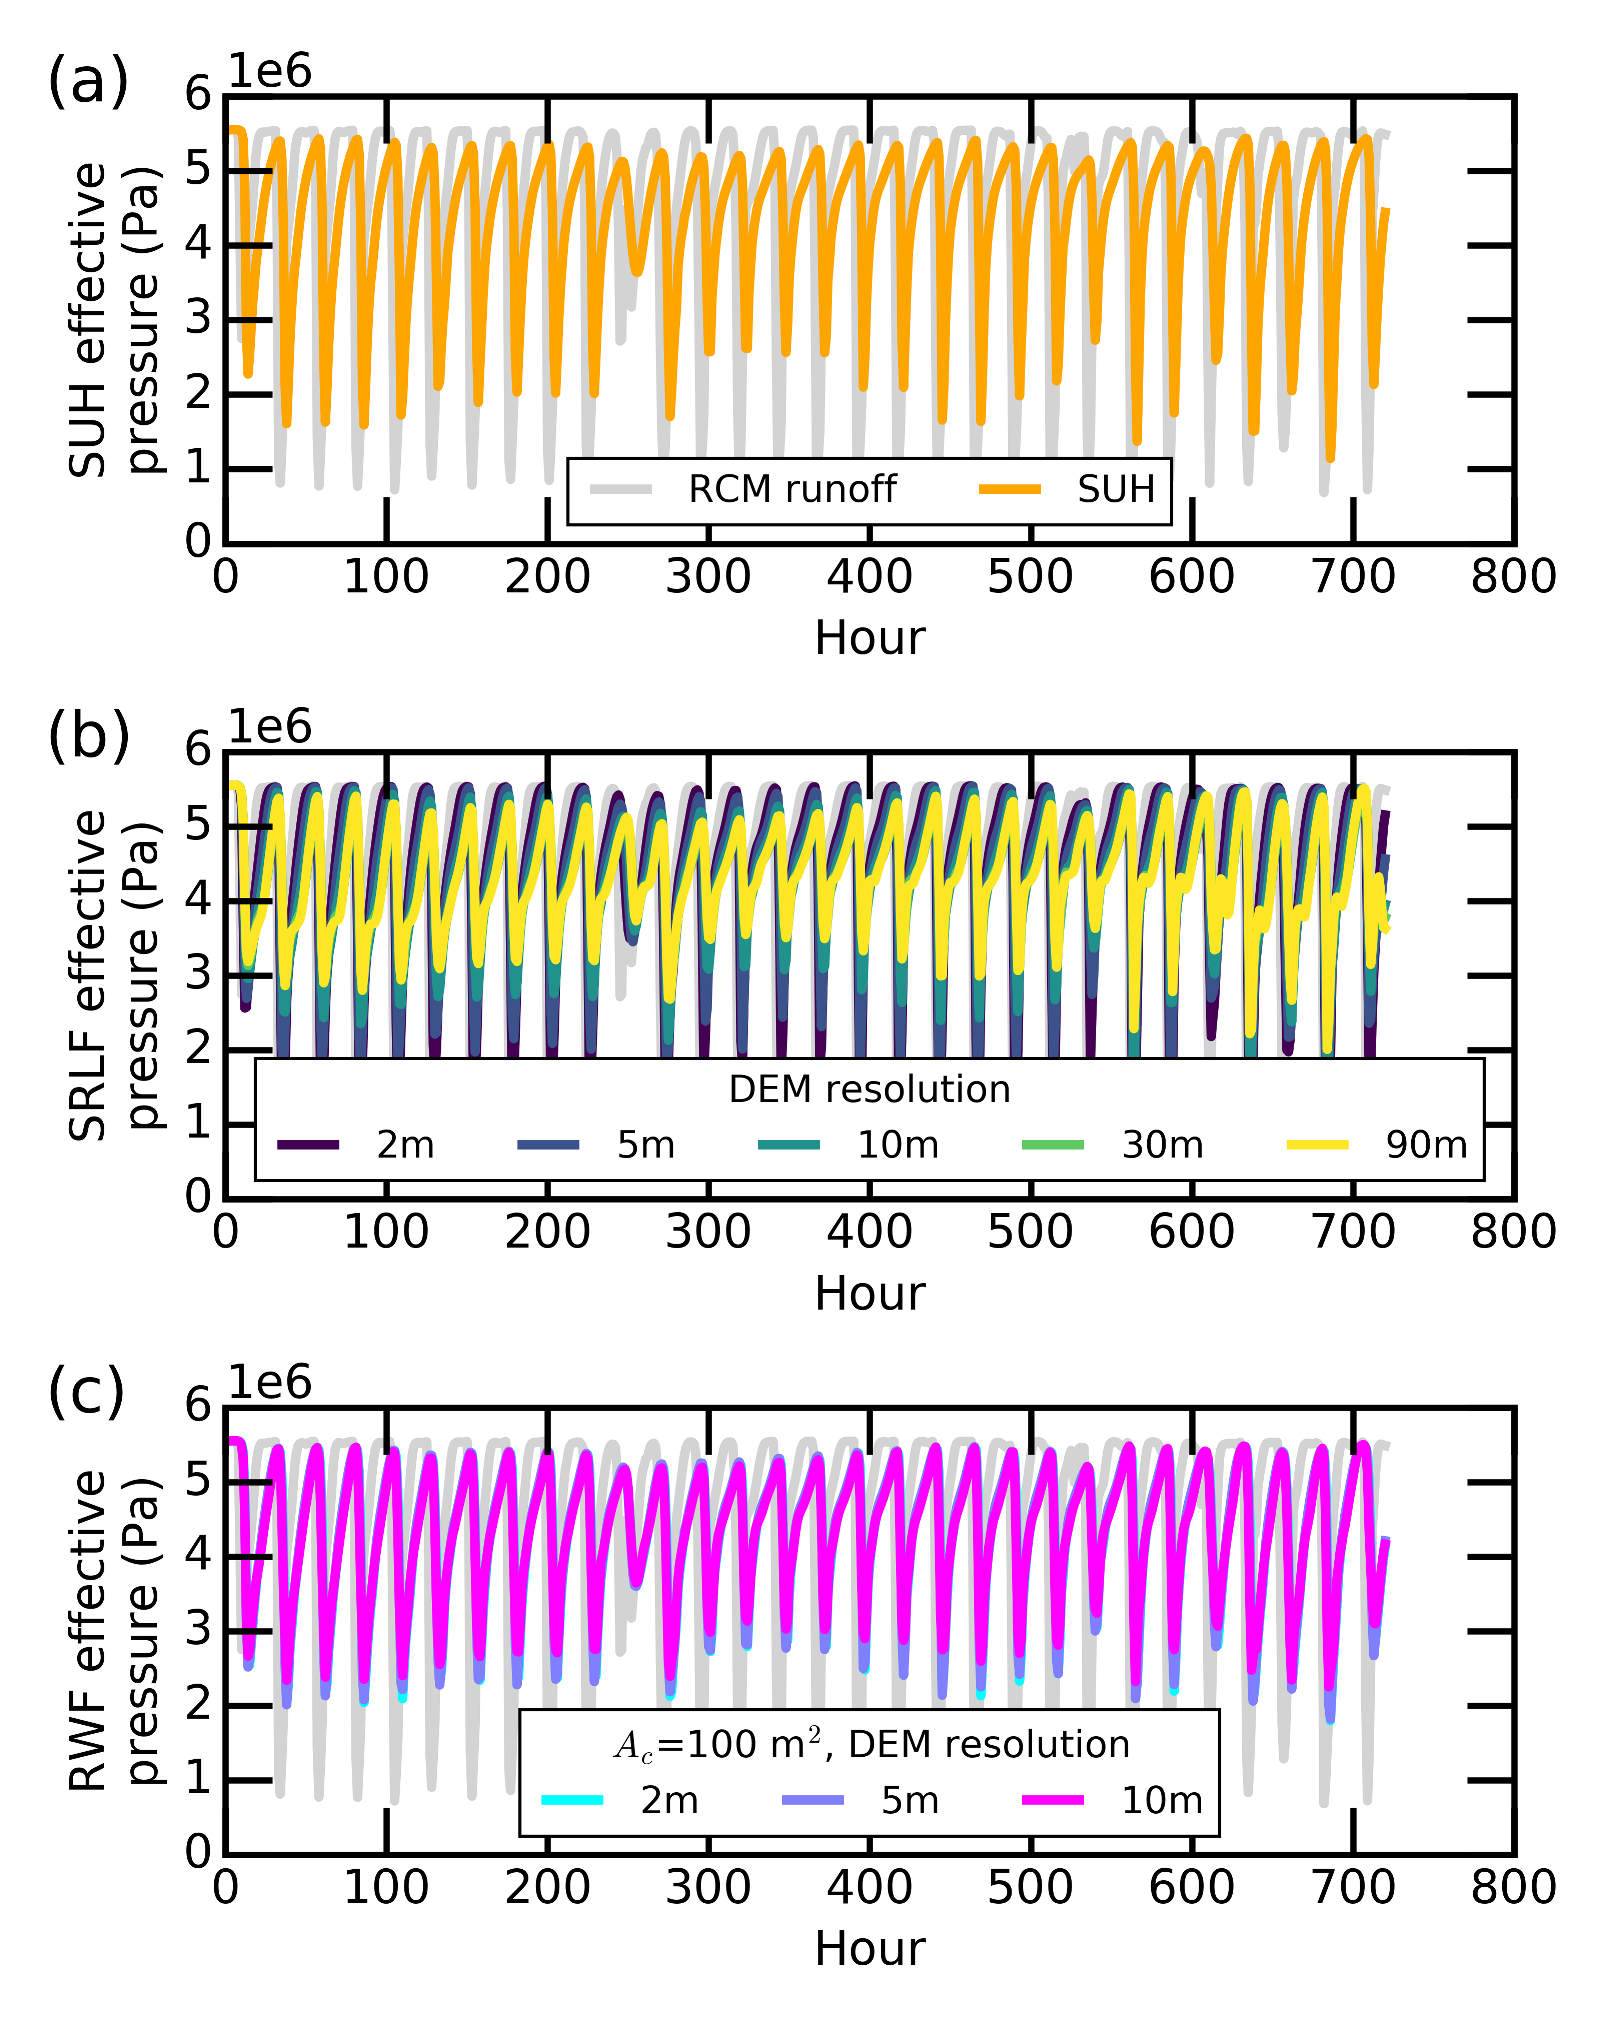

Supplement: Supplementary file 1 [file tc-14-3349-2020-supplement.zip › Figure S5.tif]

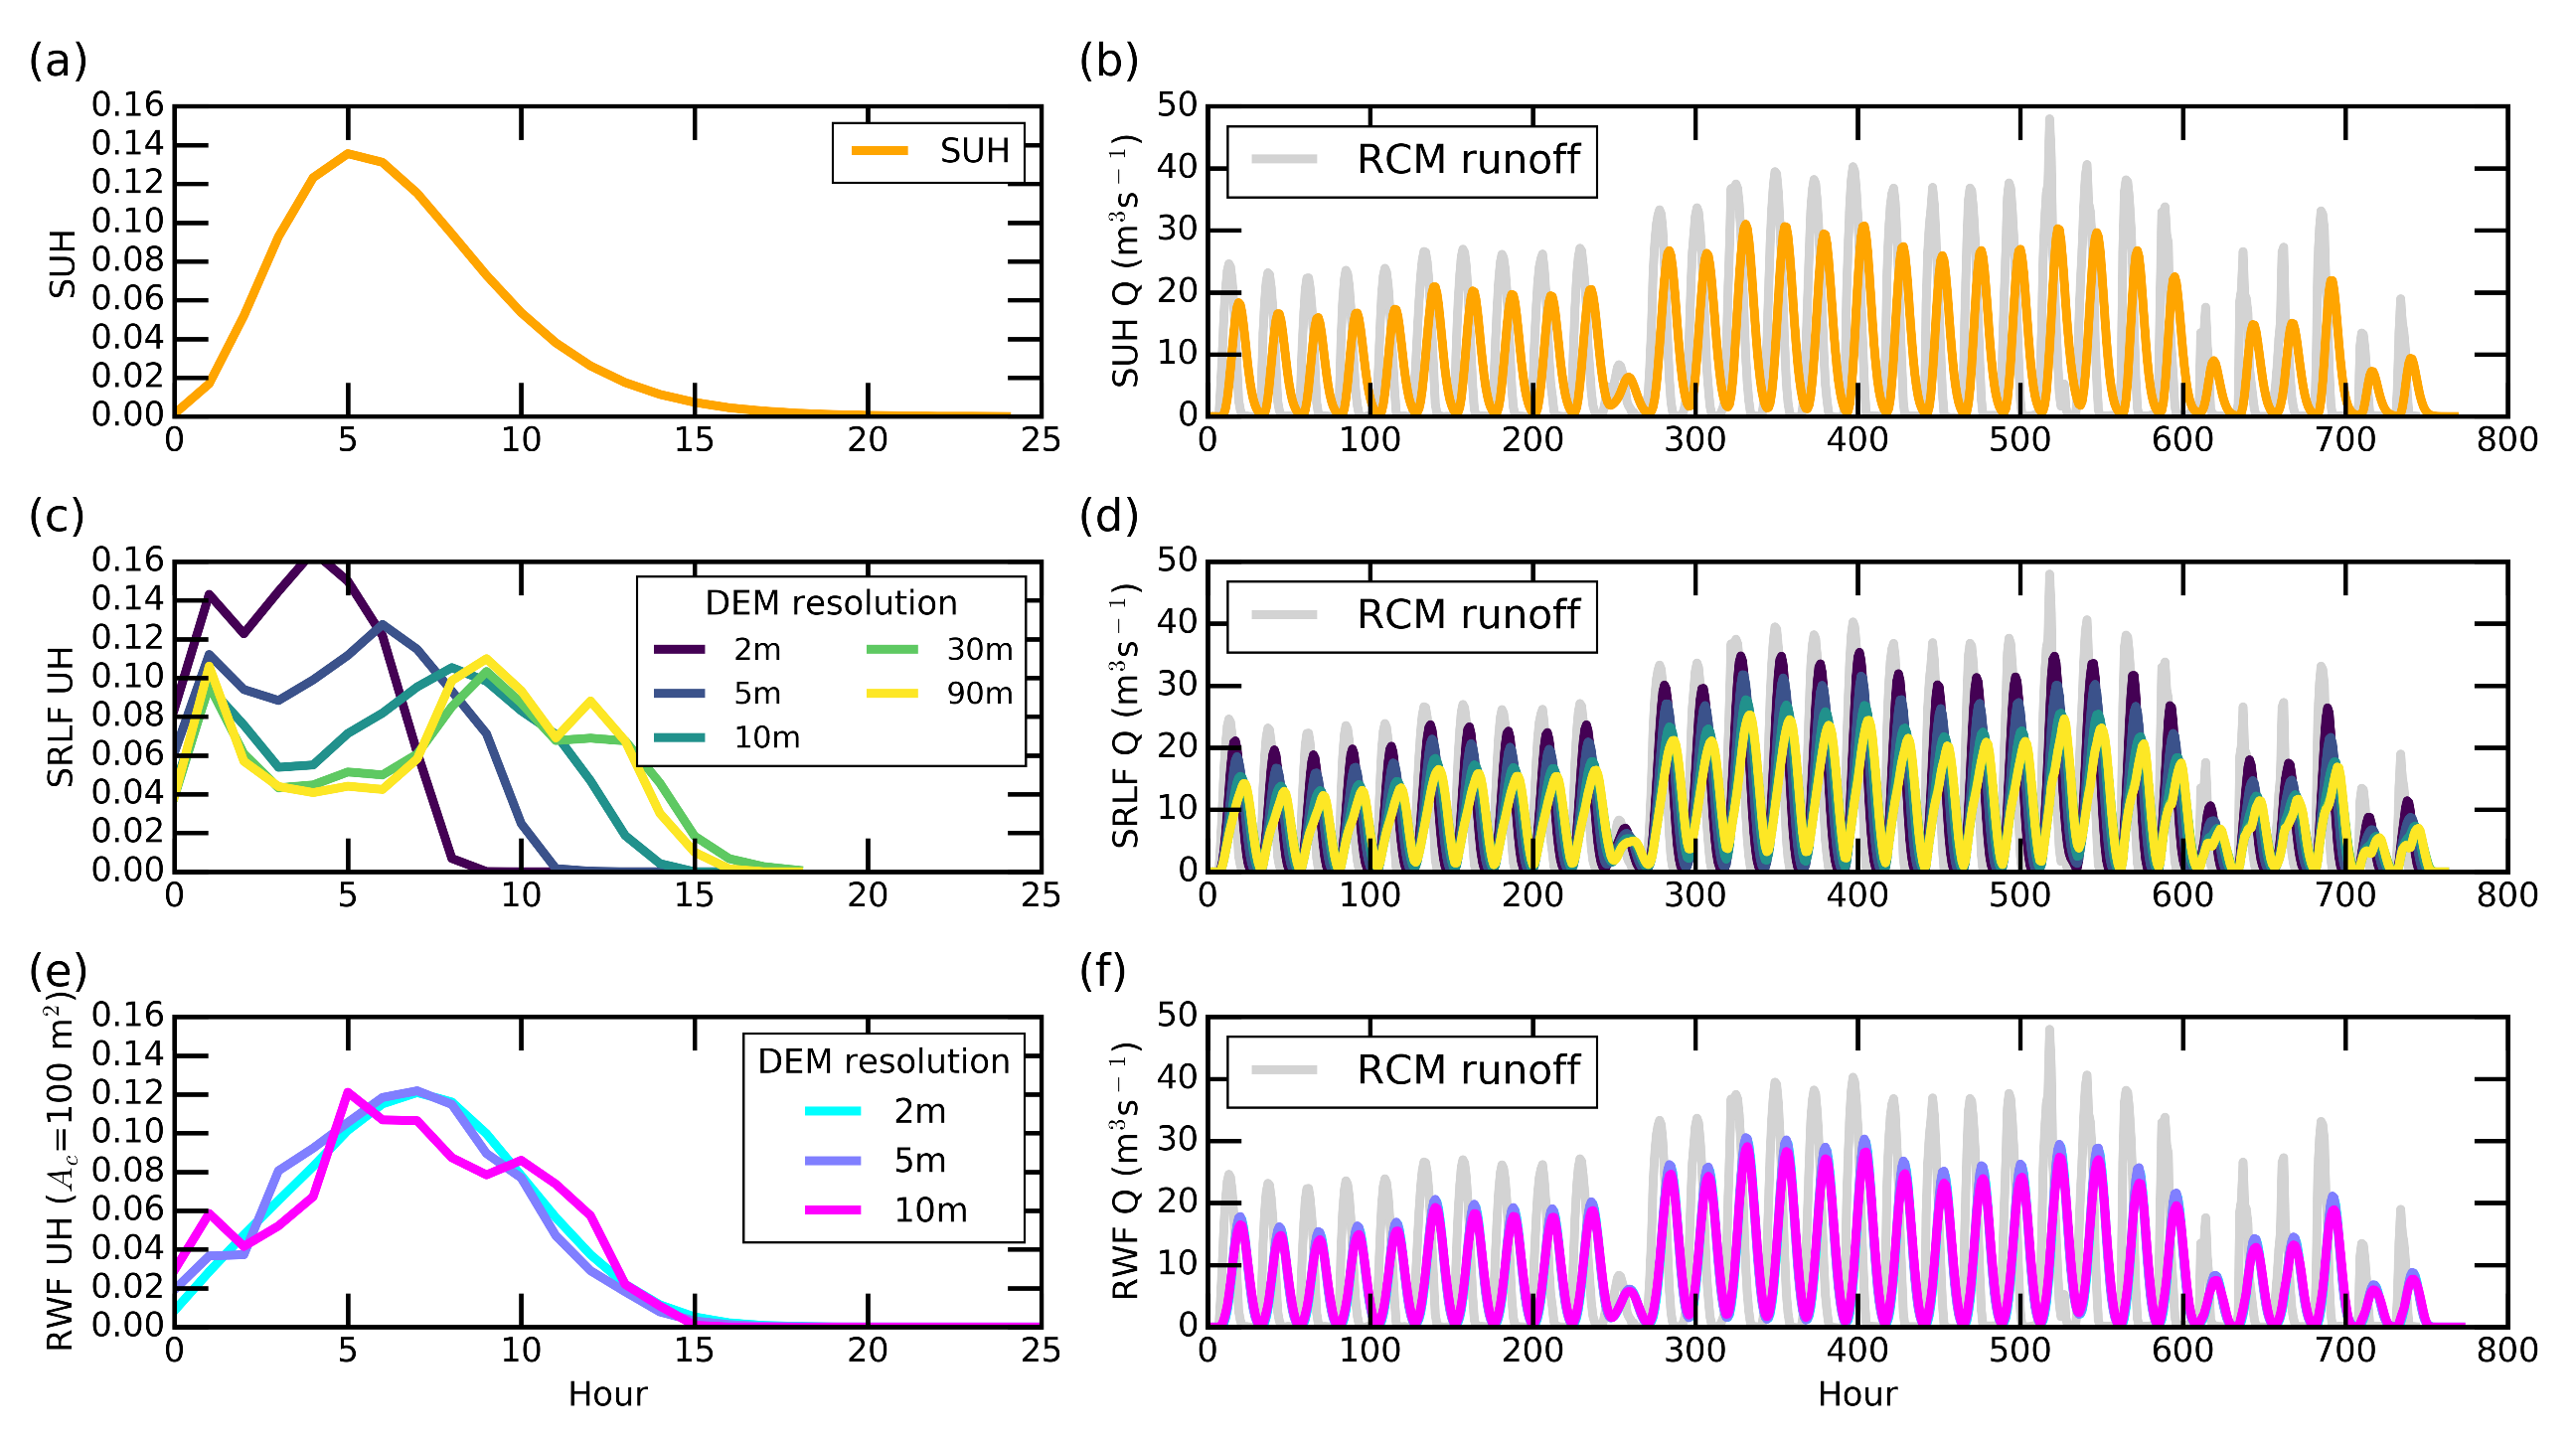

Supplement: Supplementary file 1 [file tc-14-3349-2020-supplement.zip › Figure S2.tif]

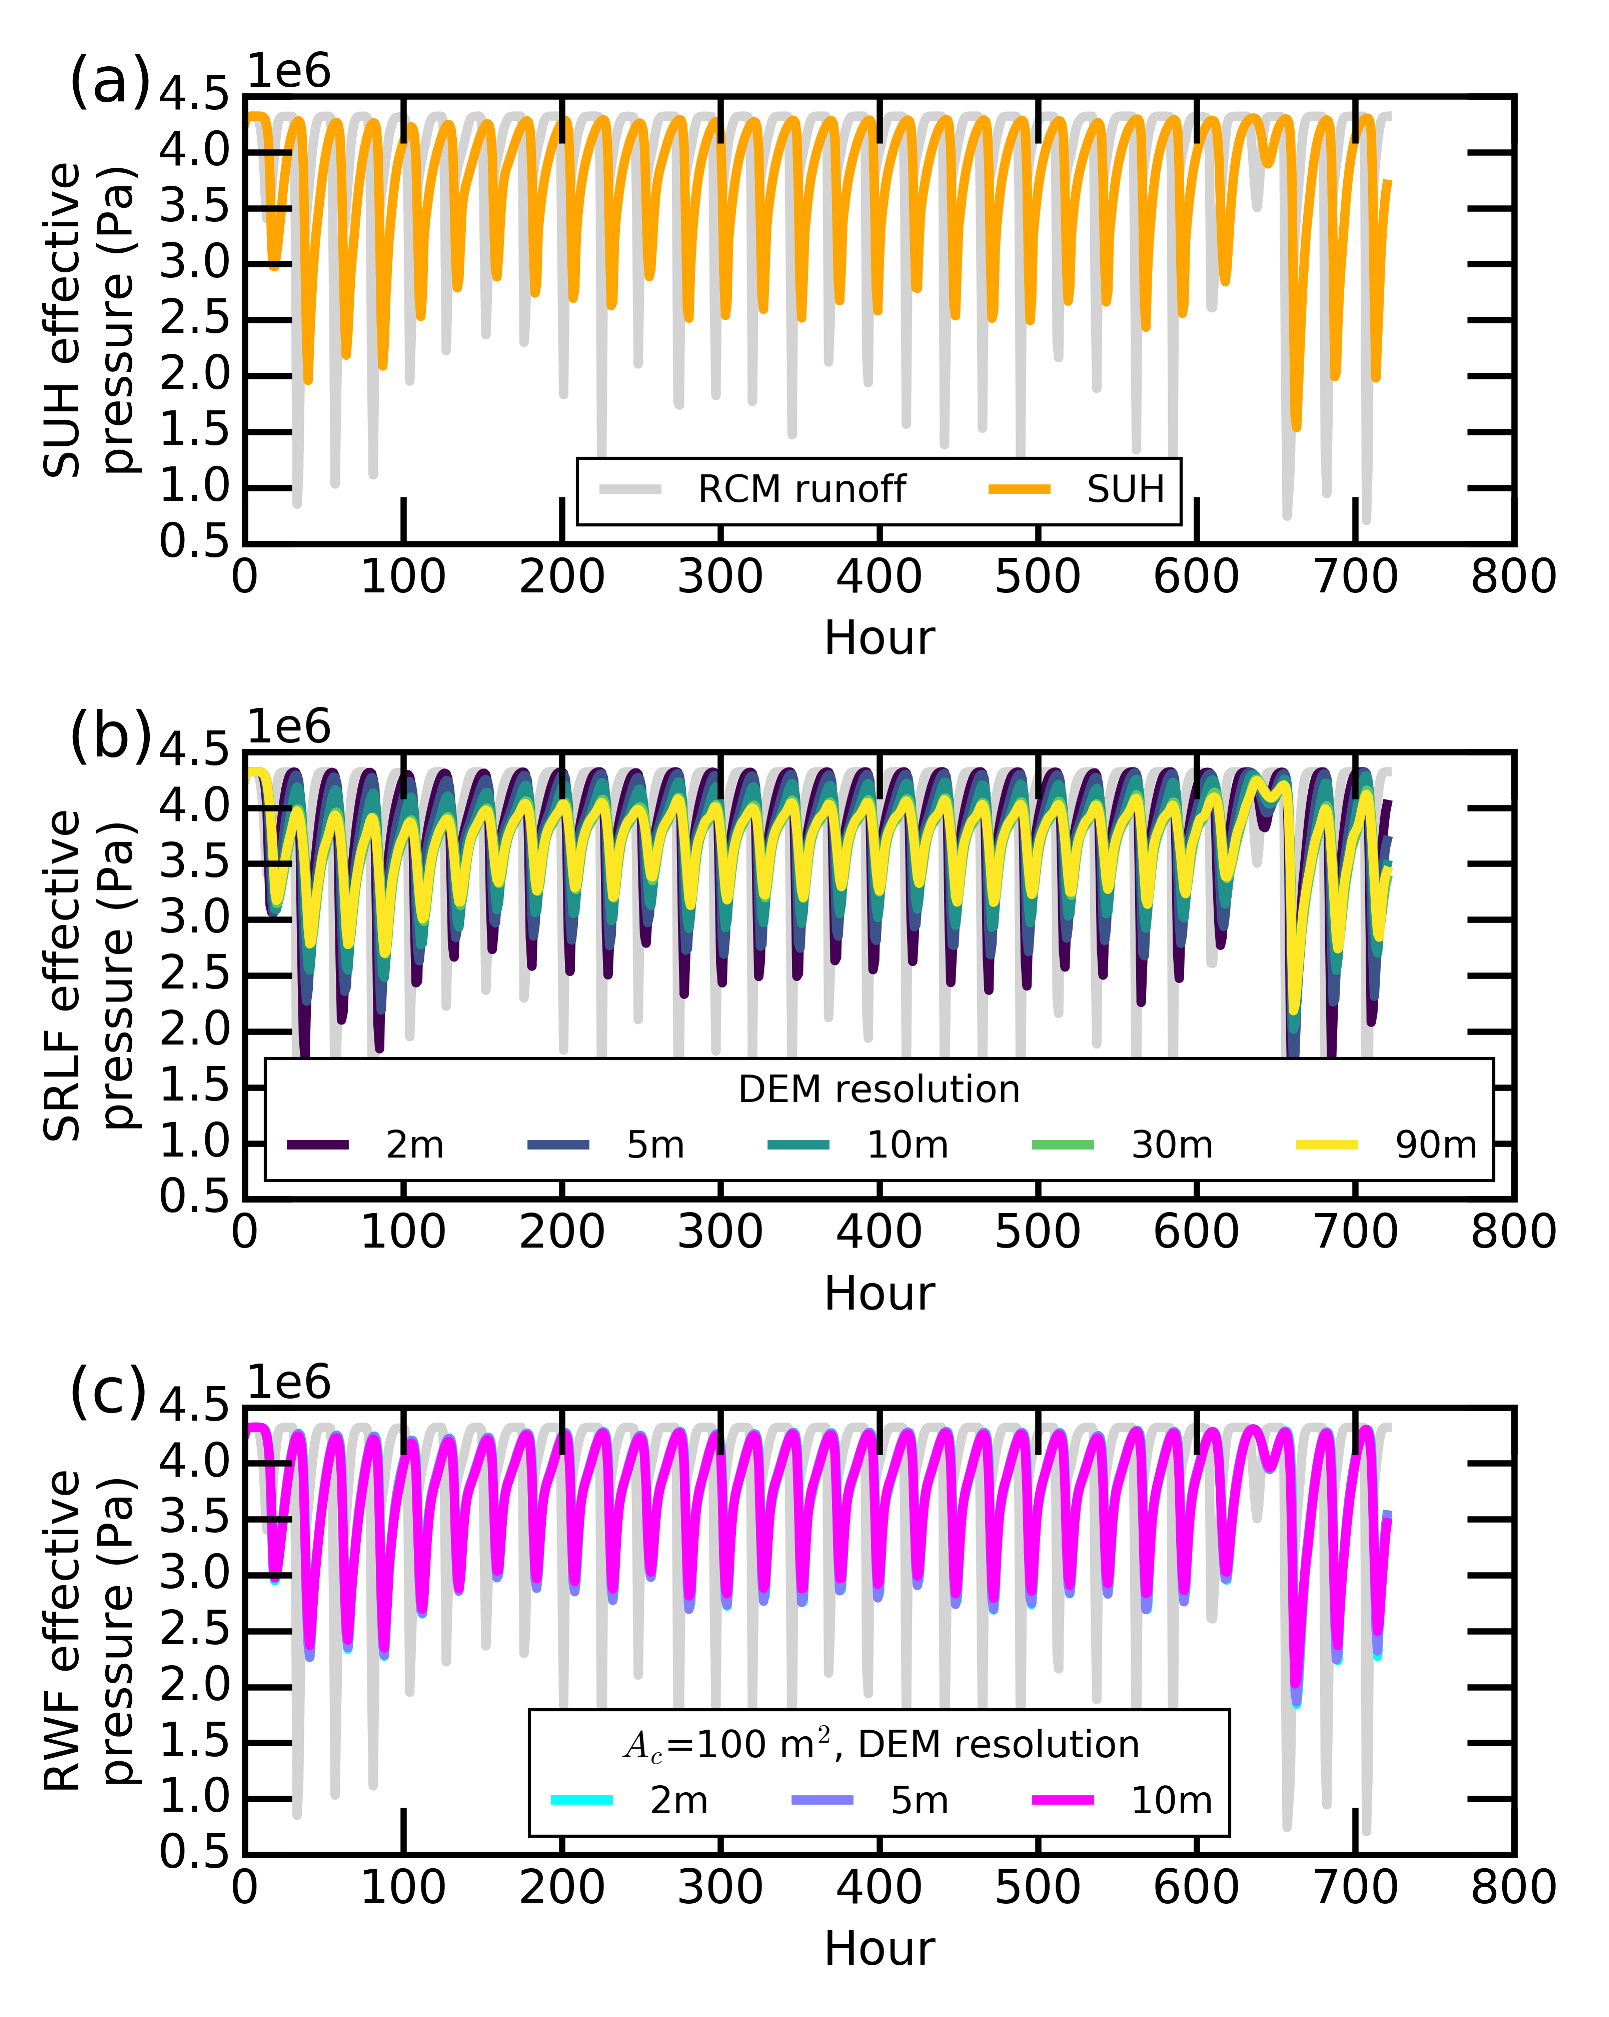

Supplement: Supplementary file 1 [file tc-14-3349-2020-supplement.zip › Figure S4.tif]

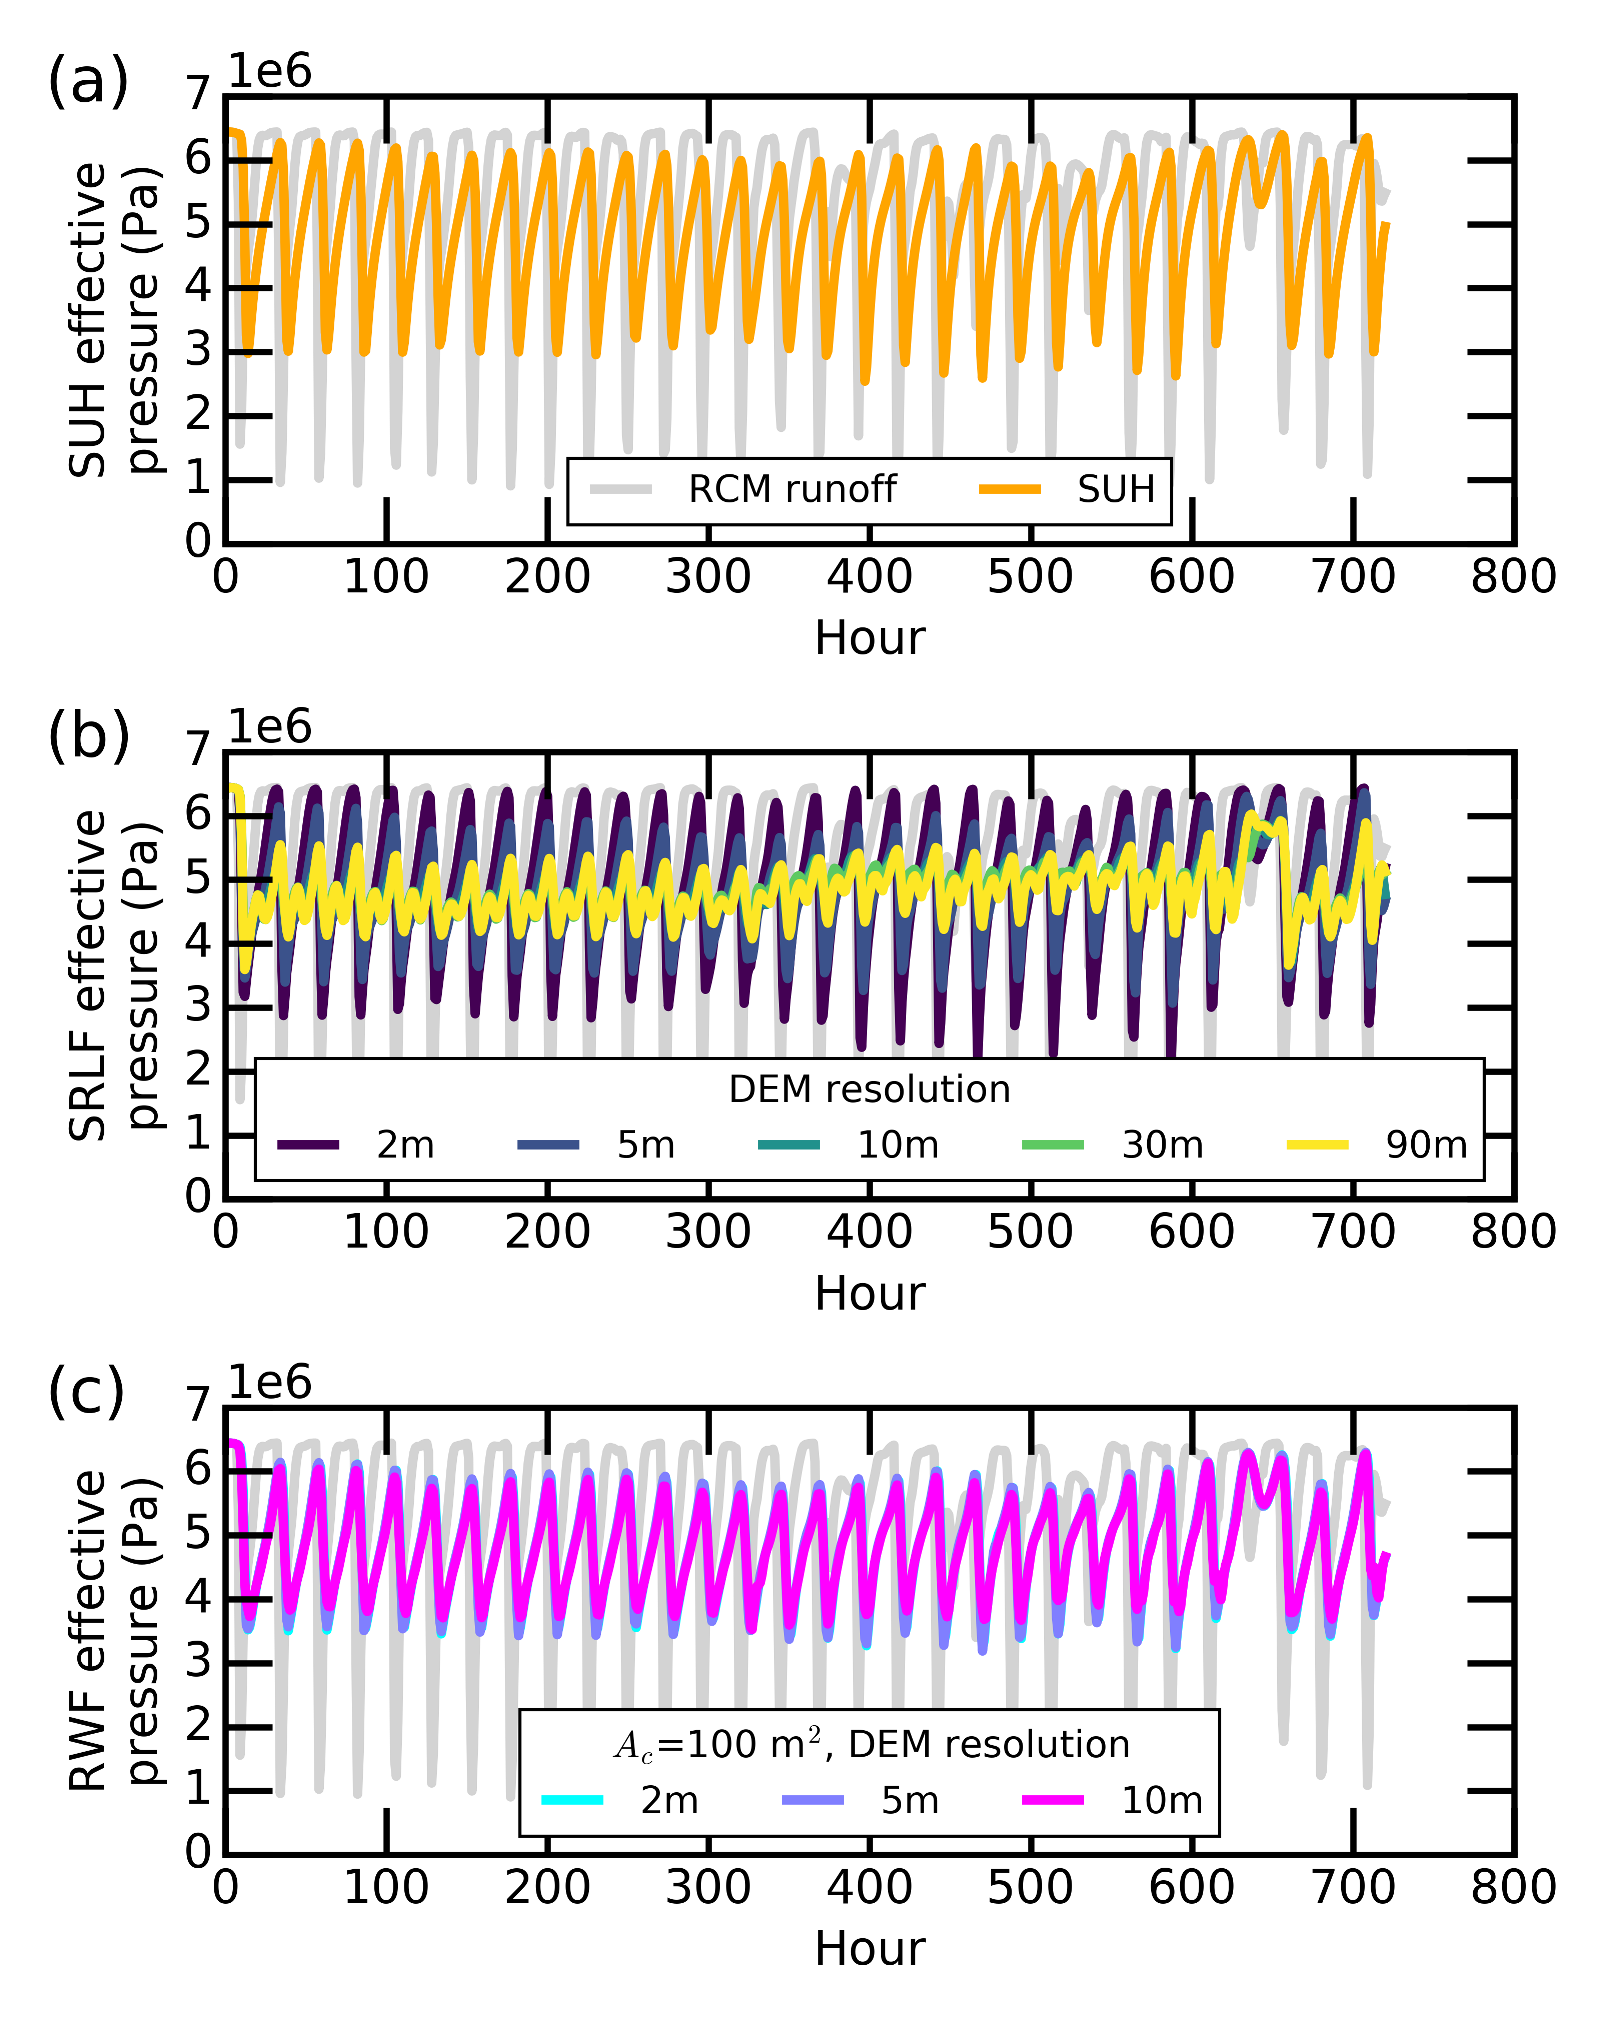

Supplement: Supplementary file 1 [file tc-14-3349-2020-supplement.zip › Figure S6.tif]

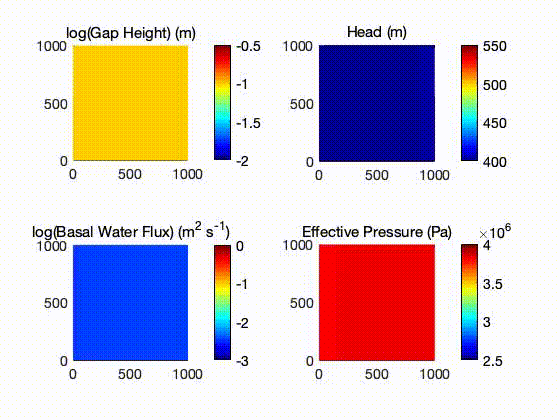

Supplement: Supplementary file 1 [file tc-14-3349-2020-supplement.zip › Figure S7.gif]

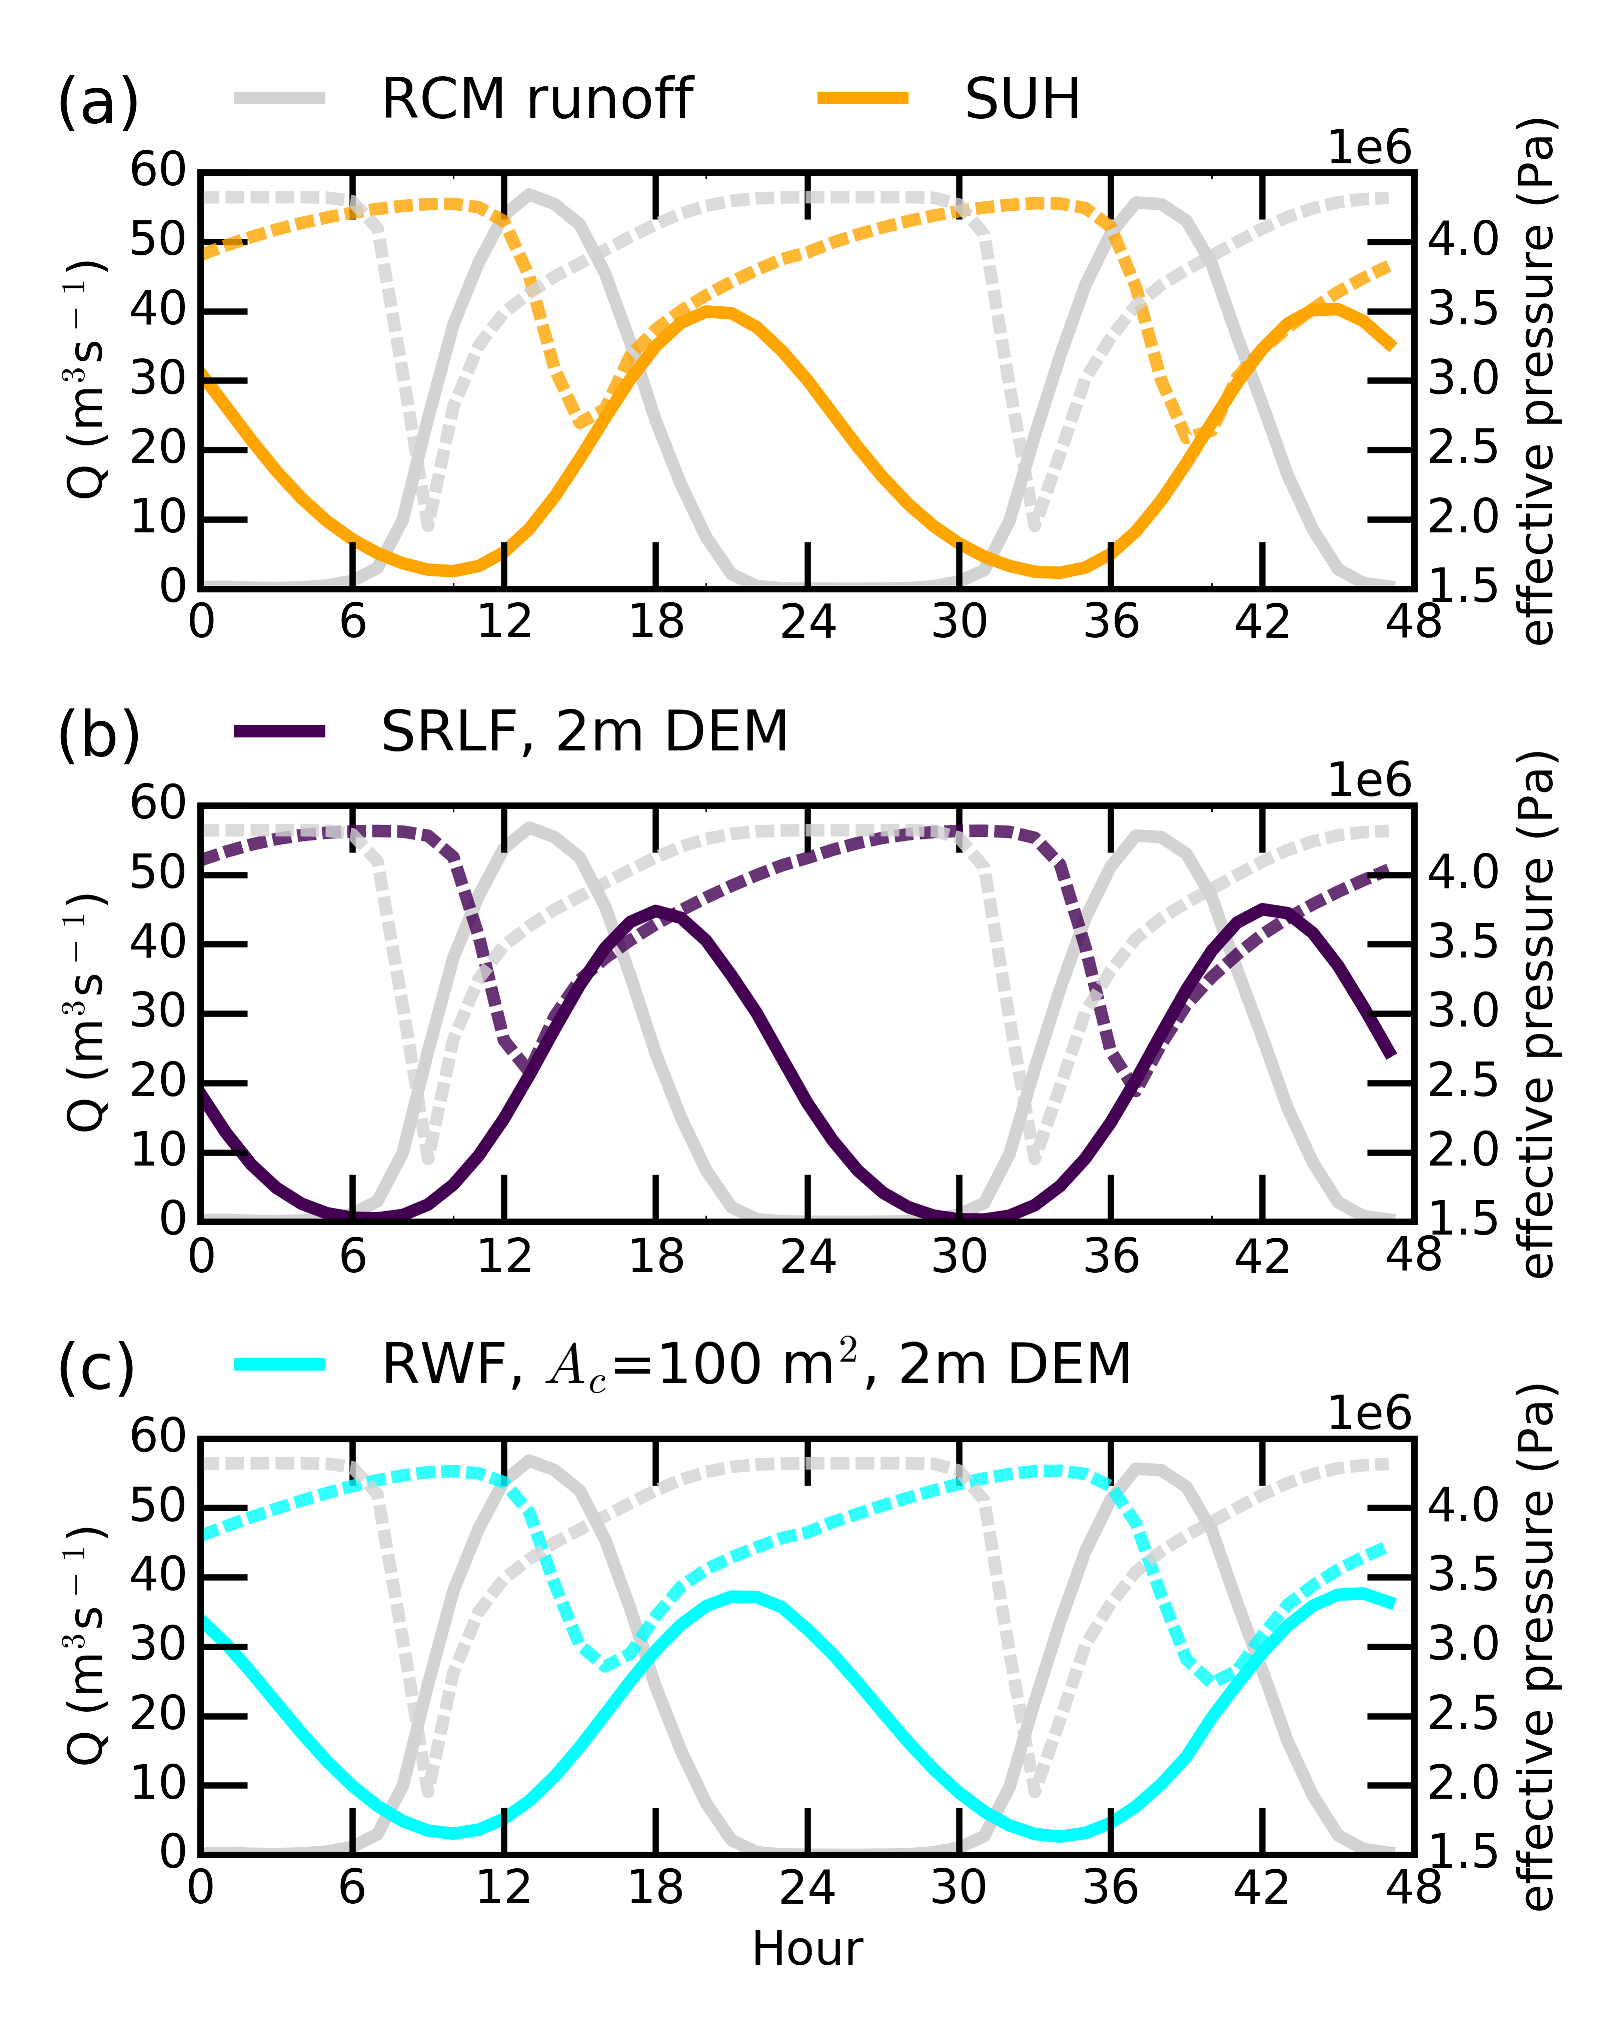

Supplement: Supplementary file 1 [file tc-14-3349-2020-supplement.zip › Figure S8.tif]
